# Supplementary material for: Familial experience of acute bacterial meningitis in children: a transversal qualitative study using interpretative phenomenological analysis
Source: PubMed Central journal article supplement — BMJ Open. 2021 Jul 29;11(7):e047465. doi: 10.1136/bmjopen-2020-047465 (PMC8292830; doi:10.1136/bmjopen-2020-047465), 2021-07-29
Supplement: bmjopen-2020-047465supp001.pdf [file bmjopen-2020-047465supp001.pdf]

May 2021

Elisabetta Scanferla  
Léonor Fasse  
Philip Gorwood

Manuscript ID bmjopen-2020-047465 Article entitled

" The familial experience of acute bacterial meningitis in children. A transversal qualitative study using interpretative phenomenological analysis."

### Call for testimonies

#### **Meningitis survivors and families wanted for telephone interviews**

---

"Petit Ange" is an association participating in a working group\* aiming to describe the long-term effects of meningitis. For that purpose the association is looking for people with meningitis and/or their family members.

To date publications have described the medical consequences of meningitis. However, impact of the disease on people's daily life, relationships with family and others, and professional career are not sufficiently known nor taken into account.

To this end the working group is looking for meningitis survivors and their families to interview either by phone or face-to-face in Paris.

Would you be interested in taking part in a phone or face-to-face interview in Paris, run by "Edusanté" and lasting approximatively 45-60 min.?

A 50-euro compensation is given for the interview.

The content of these interviews will of course remain anonymous and the association "Petit Ange" will share with you the overall results of the study, should you choose so.

(\*) - The working group consists of representatives from two associations, "Petit Ange" and "Méningite France", a pediatrician, a psychiatrist, a sociologist, and an organization dedicated to patient education and support – "Edusanté".

- The working group is independent and aims to improve knowledge about consequences of meningitis on the affected families. This research is funded by a pharmaceutical company, GSK.
